# Supplementary material for: Engineering natural matrices with black phosphorus nanosheets to generate multi-functional therapeutic nanocomposite hydrogels
Source: Royal Society of Chemistry journal article supplement (doi:10.1039/c9bm01072f), 2019-01-01
Supplement: c9bm01072f1.pdf [file c9bm01072f1.pdf]

## Supporting information

### **Engineering natural matrix with black phosphorus nanosheets to generate multi-functional therapeutic nanocomposite hydrogels†**

Yali Miao,<sup>‡ab</sup> Xuetao Shi,<sup>‡ab</sup> Qingtao Li,<sup>bc</sup> Lijing Hao,<sup>bc</sup> Lei Liu,<sup>ab</sup> Xiao Liu,<sup>ab</sup> Yunhua Chen<sup>\*abd</sup> and Yingjun Wang<sup>\*abde</sup>

<sup>a</sup> School of Materials Science and Engineering, South China University of Technology, Guangzhou 510640, China. E-mail: msyhchen@scut.edu.cn

<sup>b</sup> National Engineering Research Center for Tissue Restoration and Reconstruction, South China University of Technology, Guangzhou 510006, China. E-mail: imwangyj@scut.edu.cn

<sup>c</sup> Key Laboratory of Biomedical Engineering of Guangdong Province, and Innovation Center for Tissue Restoration and Reconstruction, South China University of Technology, Guangzhou 510006, China

<sup>d</sup> Key Laboratory of Biomedical Materials and Engineering of the Ministry of Education, South China University of Technology, Guangzhou 510006, China

<sup>e</sup> Guangzhou Regenerative Medicine and Health Guangdong Laboratory, Guangzhou 510005, China.

‡ These authors contributed equally

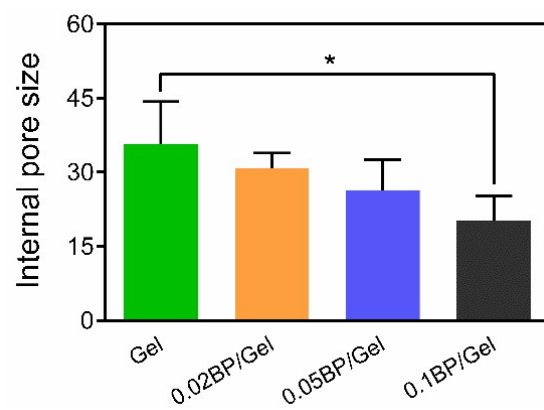

**Fig. S1** Quantitative analysis of pore size inside composite hydrogels based on SEM images.

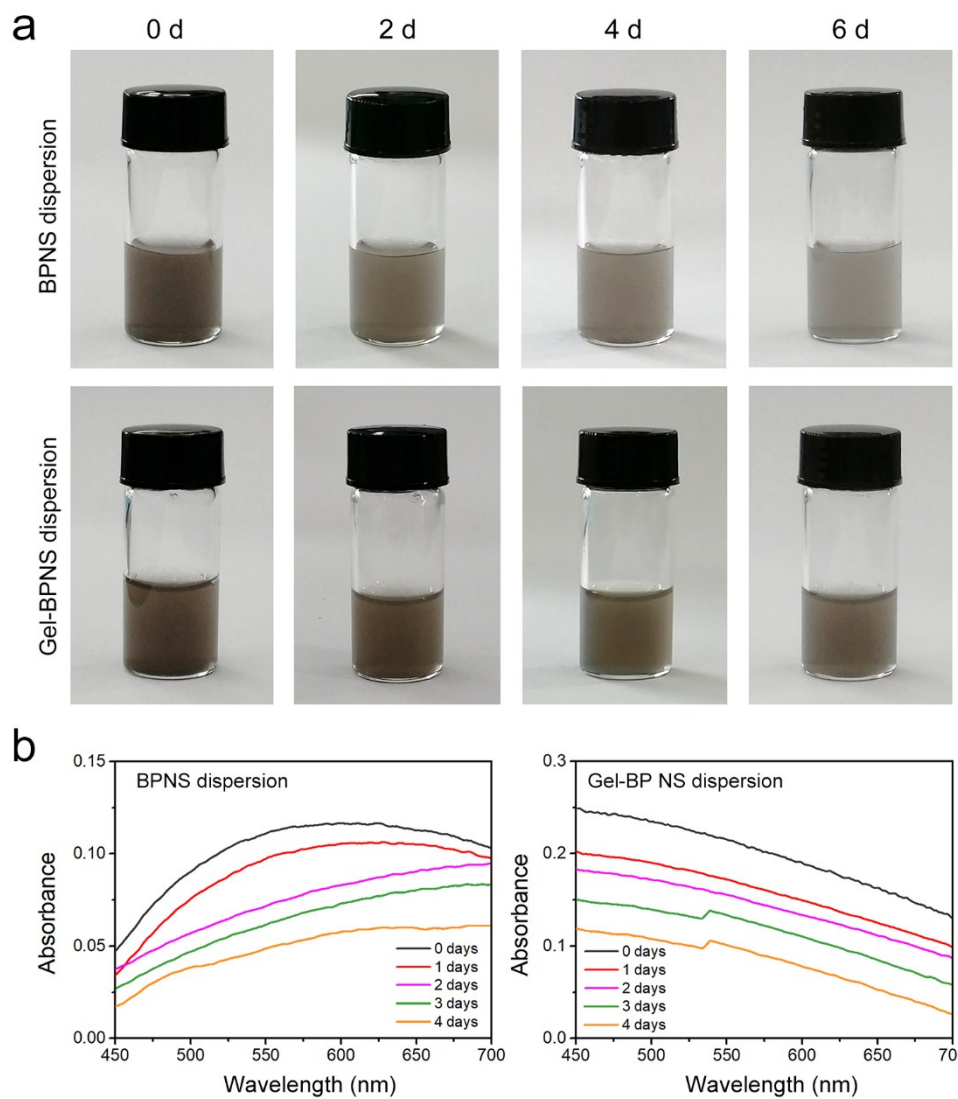

**Fig. S2** The degradation of 0.02 w/v% BP nanosheets and 0.02 w/v% GelMA decorated BP nanosheets (Gel-BP). (a) The appearance of the aqueous dispersion of BP nanosheets and Gel-BP after 0, 2, 4 and 6 days of storage. (b) The UV-Vis absorption spectra of the aqueous dispersion of BP nanosheets and Gel-BP after 0, 1, 2, 3 and 4 days of storage.

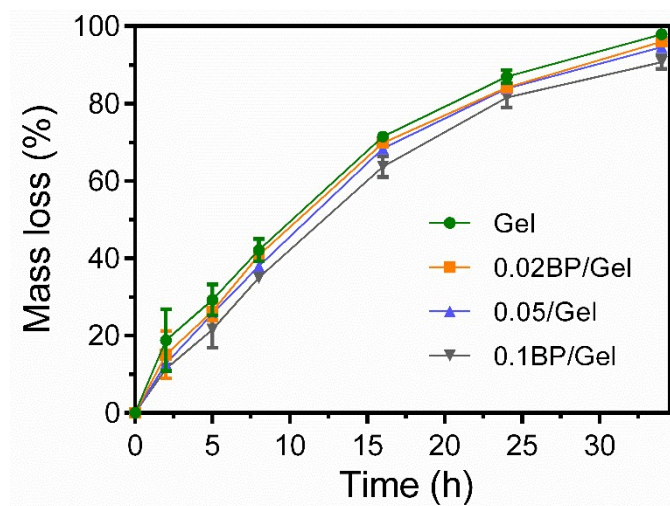

**Fig. S3** Enzymatic degradation of the nanocomposite hydrogels with different concentrations of BP nanosheets in response to collagenase II (1  $\mu\text{g}/\text{mL}$ ).

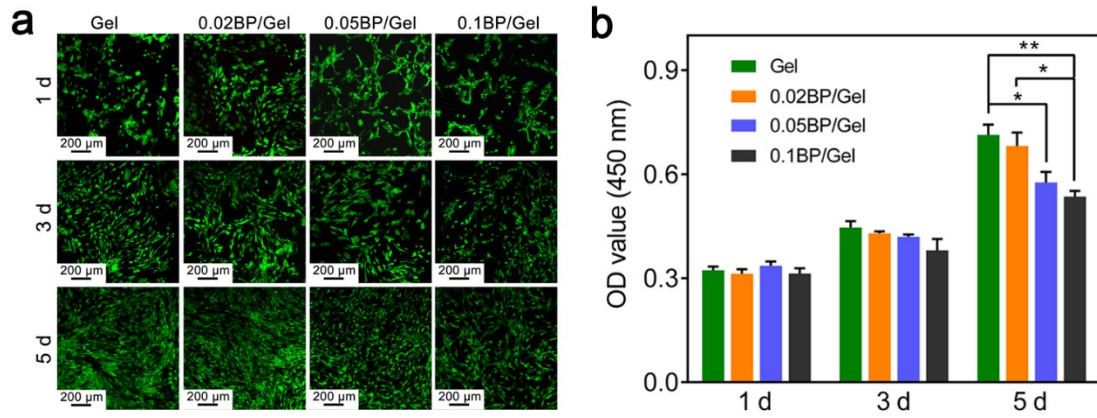

**Fig. S4** *In vitro* cell viability of therapeutic nanocomposite hydrogels. (a) Fluorescence micrographs of hMSCs cultured on hydrogels on day 1, 3 and 5. The green represents the living cells, while the red represents dead cells. (b) Proliferation of hMSCs determined by CCK8 assay (\* $p < 0.05$ , \*\* $p < 0.01$ , \*\*\* $p < 0.001$ ).

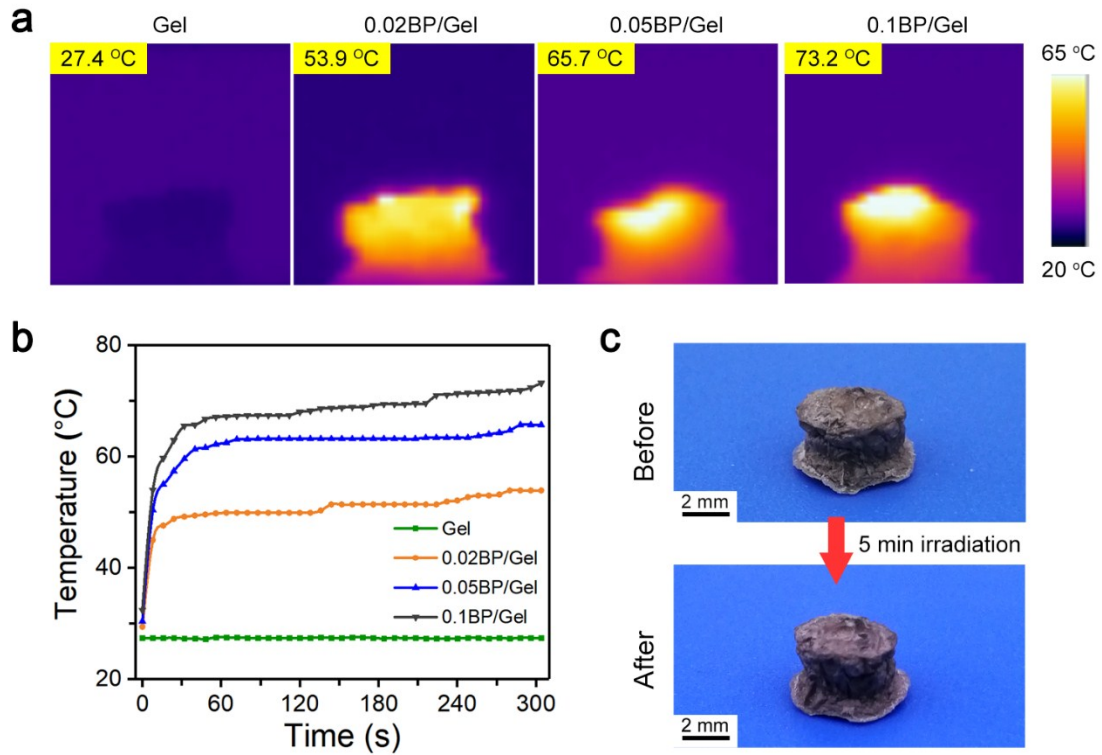

**Fig. S5** (a) Infrared thermographic photographs of dried nanocomposite hydrogels irradiated by 808 nm NIR laser ( $1 \text{ W cm}^{-2}$ ). (b) Photothermal heating curves of the nanocomposites *in vitro* as a function of time. (c) Structural stability of dried nanocomposite hydrogel before and after NIR laser irradiation.

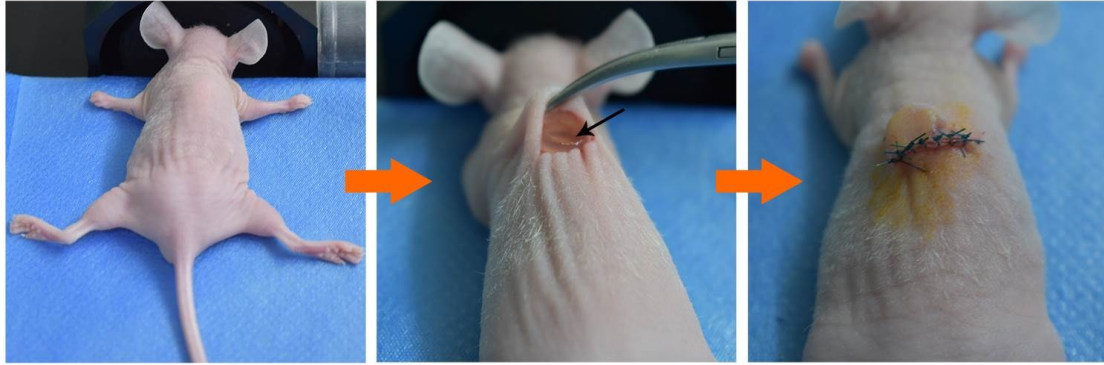

**Fig. S6** Animal experimental process consists that the implantation process of therapeutic BP/Gel nanocomposite hydrogel in nude mice and the observation of implant in nude mice before tissue collecting.

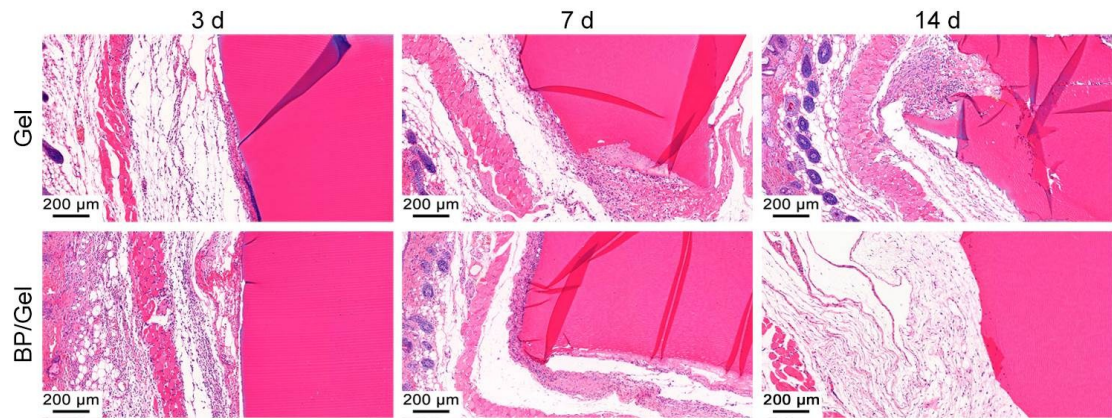

**Fig. S7** HE staining results at specific time points after implantation in nude mice to evaluate the biocompatibility of the therapeutic BP/Gel nanocomposite hydrogel.



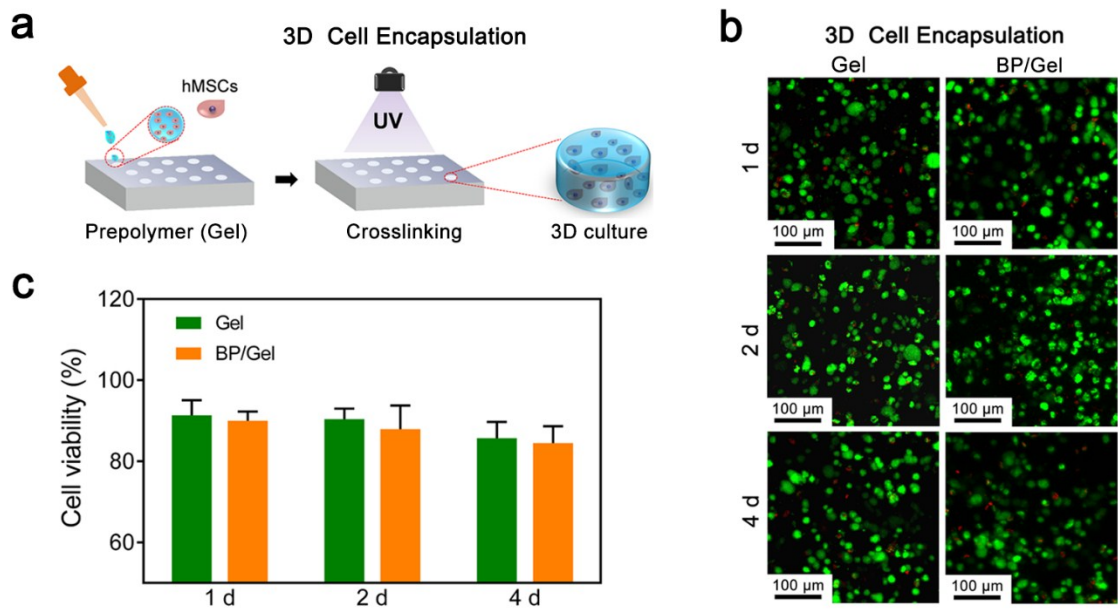

**Fig. S8** (a) The schematic diagram of 3D Cell encapsulation in BP/Gel nanocomposite hydrogel. (b) Live/dead staining assay of hMSCs cells in gelatin and BP/Gel nanocomposite hydrogel, live cells: green fluorescence, dead cells: red fluorescence. (c) Fluorescence quantitative analysis of cell viability.

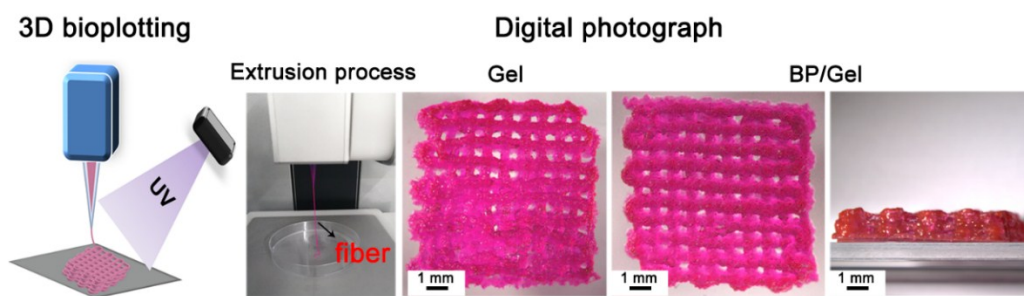

**Fig. S9** 3D printable demonstration of the therapeutic BP/Gel nanocomposite hydrogel. The addition of BP nanosheets shows great stability improvement of the hydrogel matrix after printing.
